# Supplementary material
Source: publisher figshare collection journal article supplement (https://aacr.figshare.com/articles/dataset/_/22474490)
Supplement: Supplementary file 1 [file 39925985]

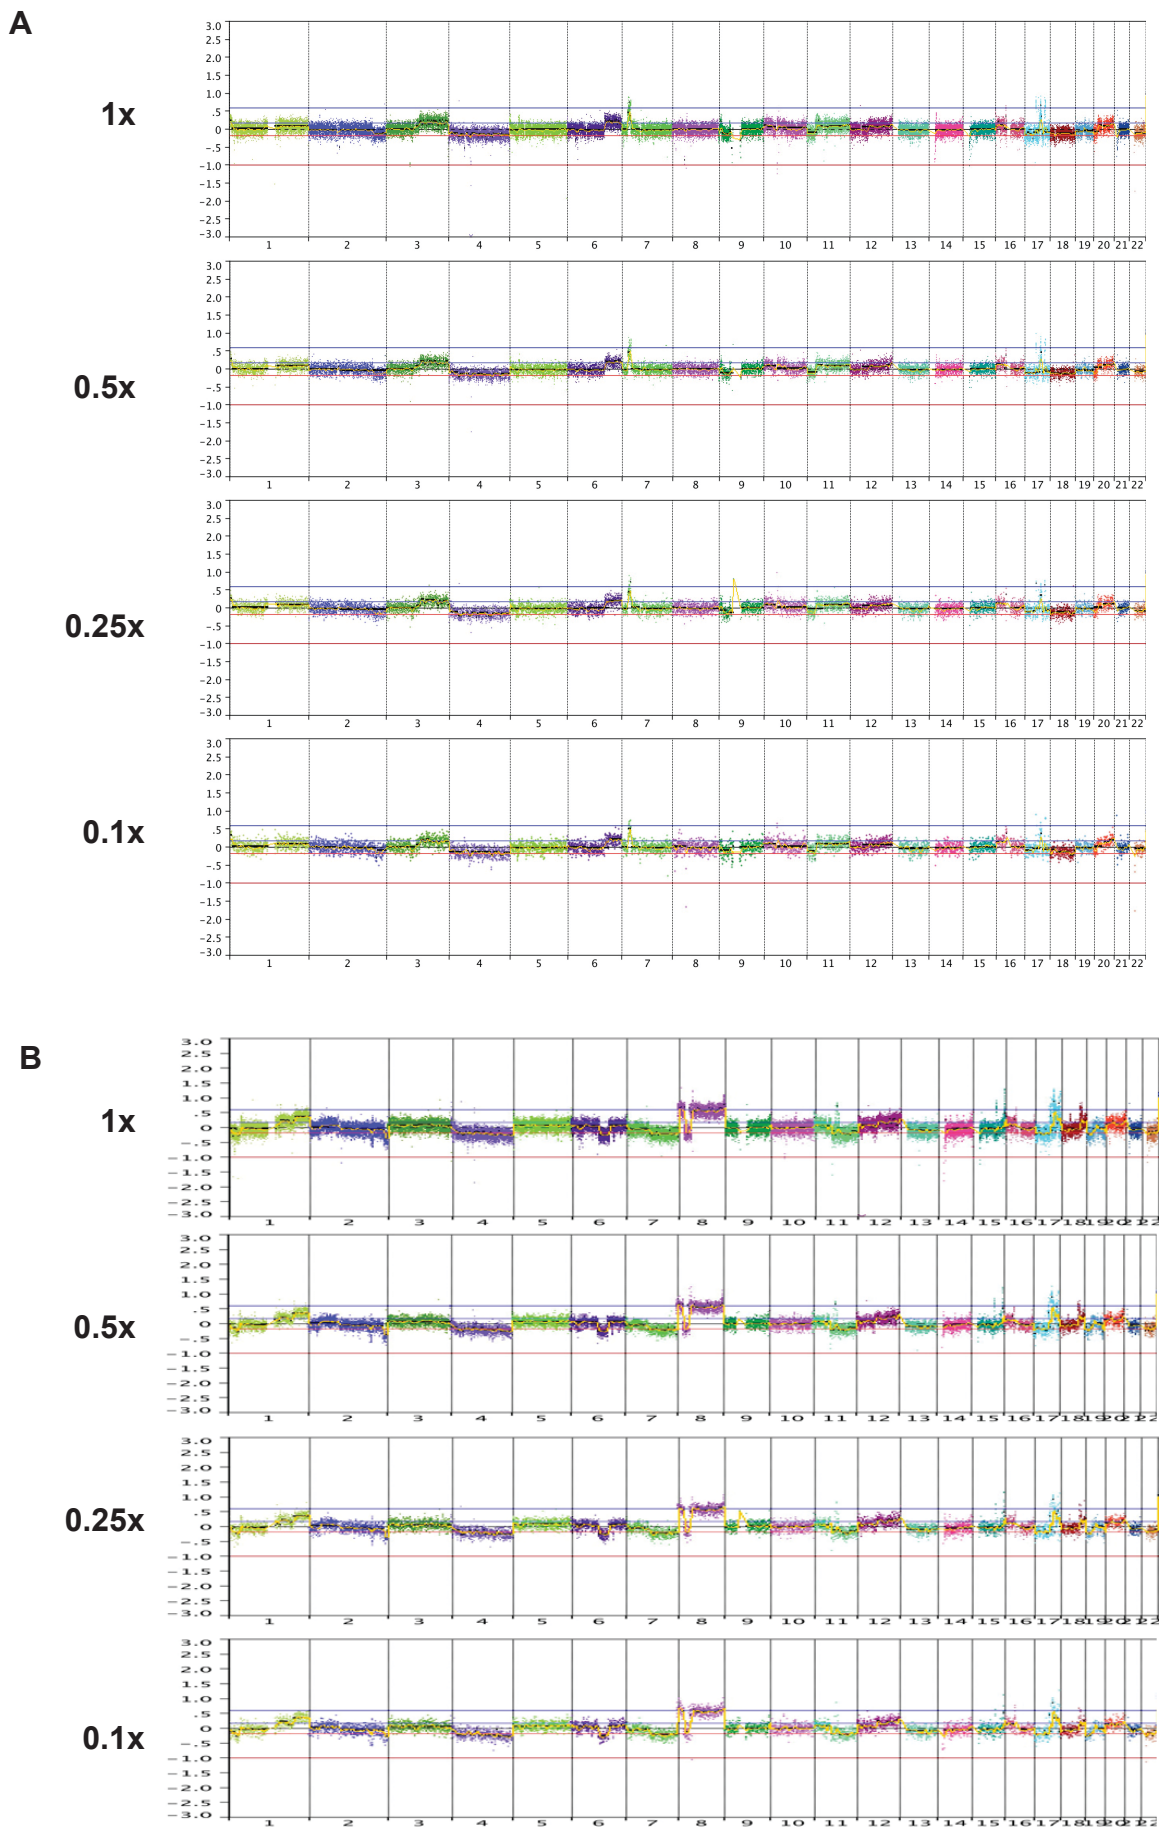

**Figure S3.** Comparison of WGS at different sequencing coverage. **A**, Whole-genome CNV landscape of patient 7452. **B**, Whole-genome CNV landscape of patient 2403.
